# Supplementary material for: Preparation of novel low-κ polyimide fibers with simultaneously excellent mechanical properties, UV-resistance and surface activity using chemically bonded hyperbranched polysiloxane
Source: Royal Society of Chemistry journal article supplement (doi:10.1039/c7tc05153k), 2018-01-01
Supplement: c7tc05153k1.pdf [file c7tc05153k1.pdf]

# Novel Low- $\kappa$ Polyimide Fibers with Simultaneously Excellent UV-resistance and Surface Activity by Chemically Bonded Hyperbranched Polysiloxane

Cairan Yang, Jie Dong\*, Yuting Fang, Lixiang Ma, Xin Zhao, Qinghua Zhang\*

State Key Laboratory for Modification of Chemical Fibers and Polymer Materials, College of Materials Science and Engineering, Donghua University, Shanghai 201620, P. R. China

\*Corresponding author: dj01@dhu.edu.cn; qhzhzhang@dhu.edu.cn

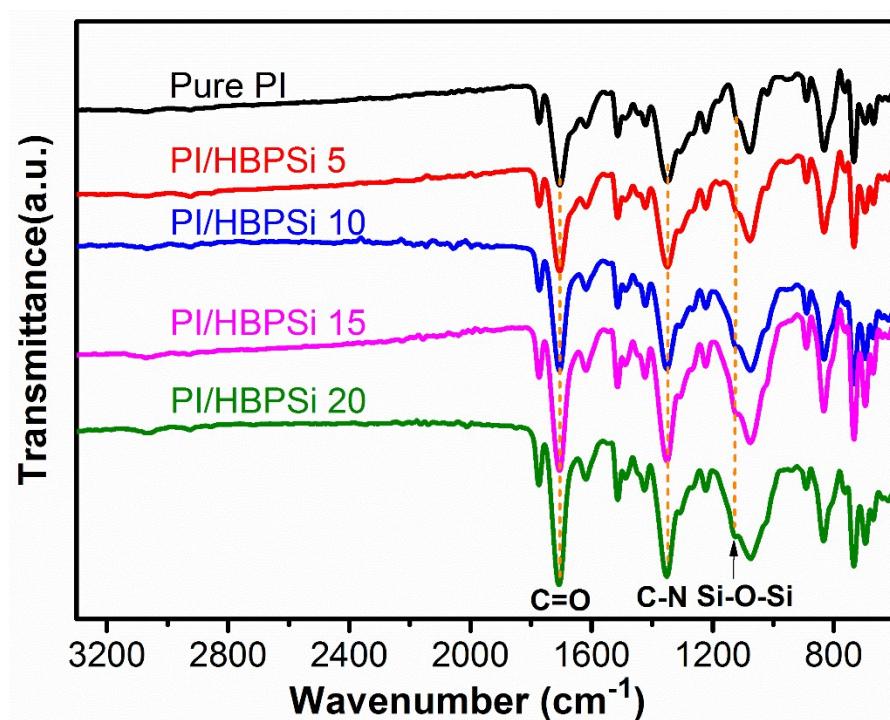

**Figure S1.** FTIR spectra of pure PI and PI/HBPSi composite fibers with various filler loadings

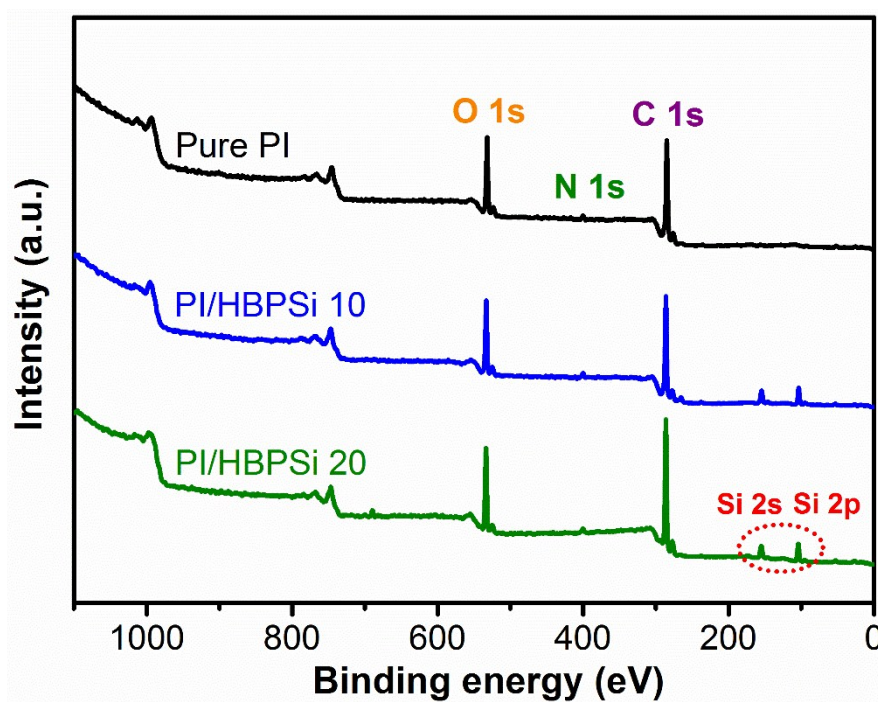

**Figure S2.** XPS survey scans of pure PI and PI/HBPSi composite fibers with various HBPSi content.
